## Non-biological synthetic spike-in controls and the AMPtk software pipeline improve mycobiome data

Jonathan M. Palmer<sup>1\*</sup>, Michelle A. Jusino<sup>1\*</sup>, Mark T. Banik<sup>1</sup>, and Daniel L. Lindner<sup>1</sup>

<sup>1</sup> Center for Forest Mycology Research, US Forest Service, Madison, WI 53726, USA

\*authors contributed equally to this manuscript

### Correspondence:

Daniel Lindner  
One Gifford Pinchot Drive  
Madison, WI 53726  
(e) [dlindner@fs.fed.us](mailto:dlindner@fs.fed.us)  
(p) 608-231-9511

Jonathan Palmer  
One Gifford Pinchot Drive  
Madison, WI 53726  
(e) [impalmer@fs.fed.us](mailto:impalmer@fs.fed.us)  
(p) 608-231-9511

## Abstract

High throughput amplicon sequencing (HTAS) of conserved DNA regions is a powerful technique to characterize microbial communities. Recently, spike-in mock communities have been used to measure accuracy of sequencing platforms and data analysis pipelines. To assess the ability of sequencing platforms and data processing pipelines using fungal ITS amplicons, we created two ITS spike-in control mock communities composed of cloned DNA in plasmids: a biological mock community (BioMock), consisting of ITS sequences from fungal taxa, and a synthetic mock community (SynMock), consisting of non-biological ITS-like sequences. Using these spike-in controls we show that: 1) a non-biological synthetic control (e.g., SynMock) is the best solution for parameterizing bioinformatics pipelines, 2) pre-clustering steps for variable length amplicons are critically important, 3) a major source of bias is attributed to initial PCR reactions and thus HTAS read abundances are typically not representative of starting values. We developed AMPtk, a versatile software solution equipped to deal with variable length amplicons and quality filter HTAS data based on spike-in controls. While we describe herein a non-biological synthetic mock community for ITS sequences, the concept and AMPtk software can be widely applied to any HTAS dataset to improve data quality.

**Keywords** – amplicon toolkit (AMPtk), environmental sequencing, eukaryotic DNA, fungi, metabarcoding, next-generation sequencing, non-biological synthetic mock community, spike-in control, rRNA internal transcribed spacer (ITS).

**Availability and Implementation** - AMPtk is publically available at <https://github.com/nextgenusfs/amptk>. All primary data and data analysis done in this manuscript are available via the Open Science Framework (<https://osf.io/4xd9r/>). The SynMock sequences and the script to produce them are available in the OSF repository (<https://osf.io/4xd9r/>) as well as packaged into AMPtk distributions.

## Introduction

High-throughput amplicon sequencing (HTAS) is a powerful tool that is frequently used for examining community composition of environmental samples. HTAS has proven to be a robust and cost-effective solution due to the ability to multiplex hundreds of samples on a single next-generation sequencing (NGS) run. However, HTAS output from environmental samples requires careful interpretation and appropriate and consistent use of positive and negative controls (Nguyen et al. 2015). One of the major challenges in HTAS is to differentiate sequencing error versus real biological sequence variation. Considerable progress has been made in the last several years via improved quality of sequencing results through manufacturer upgrades to reagents as well as improved quality filtering and “clustering” algorithms. While most algorithm development in HTAS is focused on the prokaryotic microbiome, using the 16S subunit of the rRNA array (e.g. QIIME (Caporaso et al. 2010), Mothur (Schloss et al. 2009), UPARSE (Edgar 2013), DADA2 (Callahan et al. 2016)), many of these same tools have been adopted for use with other groups of organisms, such as fungi.

The internal transcribed spacer (ITS) region of the rRNA array has emerged as the molecular barcode for examining fungal communities in environmental samples (Schoch et al. 2012). The ITS region is multi-copy and thus easily amplifiable via PCR even from environmental samples with low quantities of fungal DNA. The ITS region consists of two subunits, ITS1 and ITS2, and is generally conserved within fungal species yet possess enough variability to differentiate between species in many taxonomic groups. Because of its widespread use, several public databases are rich with reference fungal ITS sequences (Schoch et al. 2012). However, there are several properties of fungi and the fungal ITS region that are potentially problematic for HTAS that include: i) fungi have variable cell wall properties making DNA extraction efficiency unequal for different taxa and/or cell types (hyphae, fruiting bodies, spores, etc) (Vesty et al. 2017), ii) the number of nuclei per cell is variable between taxa (Roper et al. 2011), iii) the number of copies of the rRNA array are different between taxa and in some cases isolates of the same taxa (Ganley & Kobayashi 2007), iv) a single isolate can have multiple ITS sequences (intragenomic variability; (Lindner & Banik 2011; Simon & Weiss 2008)), v) the ITS region is highly variable in length, vi) ITS sequences vary in GC content, and vii) there are a variable number of homopolymer repeats. Additionally, current read lengths of commonly used sequencing platforms (Illumina Miseq currently covers ~ 500 bp (2 x 300) and Ion Torrent is 450 bp) are not long enough to cover the entire length of the ITS region, which is typically longer than 500 bp. However, conserved priming sites exist to amplify either the ITS1 region or the ITS2 region, which has been shown to be sufficient for taxonomic identification.

While several studies have used the ITS1 region for HTAS, the ITS1 region contains introns in some taxa and thus to avoid potential bias it has been suggested that ITS2 region should be the preferred region for fungi (Taylor et al. 2016) (Figure 1A). Progress has recently been made using single-molecule DNA sequencing (e.g. PacBio) to assess fungal communities with long read lengths (up to 3000 base pairs), but this has not yet been widely adopted due to cost and technical hurdles (James et al. 2016; Tedersoo et al. 2018).

Sequencing error is a known problem across NGS platforms used for HTAS. To address issues with sequencing error and reliability of results from HTAS, it has become increasingly common practice to use spiked-in “mock” community samples as positive controls for the parameterization and optimization of experimental workflows and data processing. Spike-in mock community controls for fungal ITS have been used (Amend et al. 2010; De Filippis et al. 2017; Nguyen et al. 2015; Taylor et al. 2016; Tonge et al. 2014), and have consisted of fungal genomic DNA (gDNA) extracted from tissue from fruiting bodies, cultures, or spores of a number of taxa which are then (usually) combined in equimolar amounts. Mock communities composed of fungal gDNA from fruiting bodies, spores, and/or hyphae provide a measure of success of extraction, PCR, and sequencing and thus are useful in the HTAS workflow. However, such mock communities are of limited value if used to validate/parameterize data processing workflows due to intrinsic properties of the ITS region mentioned previously (variable copy number, intraspecific variation, variable length, etc.). Therefore, there is a need for fungal ITS spike-in control mock communities that function to validate laboratory experimental design, validate data processing steps, and compare results between sequencing runs and platforms.

HTAS is cost-effective due to the ability to massively multiplex environmental samples on a single sequencing run. This process depends on the attachment of a unique sequence identifier (referred to as a barcode, an index, or a tag, depending on sequencing platform) to each piece of DNA to be sequenced. In recent years, “index-bleed (“index hopping”, “tag jumping”, “barcode jumping”, “tag switching”, or “barcode switching”) has been noted to occur on Roche 454 platforms as well as Illumina platforms (Carlsen et al. 2012; Degnan & Ochman 2012; Kircher et al. 2011; Philippe et al. 2015; Schnell et al. 2015). Index-bleed can lead to over-estimation of diversity in environmental samples (Philippe et al. 2015; Schnell et al. 2015) and mis-assignment of sequences to samples. It has been noted that spike-in mock communities may be useful to help detect index-bleed, and subsequent filters may be applied for use with the HTAS pipeline of choice (Degnan & Ochman 2012; Philippe et al. 2015).

We hypothesized that a mock community composed of cloned fungal ITS sequences (in plasmids) would circumvent several of the variability issues associated with using mock

communities composed of fungal DNA or fungal tissue (variable copy number, intraspecific variation, etc), allowing for a definitive assessment of HTAS for mycobiome studies.

Subsequently, we found that current “off-the-shelf” software solutions performed poorly using these fungal ITS community standards and thus developed AMPtk (amplicon toolkit), a versatile software pipeline that improves results from HTAS data. Furthermore, we designed a non-biological synthetic spike-in mock community consisting of ITS-like sequences (SynMock) that, when coupled with AMPtk, provides a simple method to reduce the effects of index-bleed between multiplexed samples on a HTAS run.

## Materials and Methods

### *Biological mock community (BioMock)*

To construct the Biomock we selected 26 identified fungal cultures (Supporting Information Table S1) from the Center for Forest Mycology Research (CFMR) culture collection (US Forest Service, Madison, Wisconsin). These cultures were purposefully chosen to represent a taxonomic range of fungi, including paralogs, fungi with GC rich ITS regions, a variety of ITS lengths, and fungi with a variety of homopolymers in the ITS region. To measure the sensitivity of our bioinformatics approach, we also included two ITS sequences from *Leptoporus mollis* that were isolated from the same culture as an example of intragenomic variation in the fungal ITS region. These two sequences are more than 3% divergent (95.9% identical) and thus would typically represent separate operational taxonomic units (OTUs) in a clustering pipeline, despite being from the same fungal isolate. All cultures were grown on cellophane on malt extract agar, and DNA was extracted from pure cultures following (Lindner & Banik 2008). Following extraction, the genomic DNA was PCR amplified using the fungal ITS specific primers ITS-1F (Gardes & Bruns 1993) and ITS4 (White et al. 1990). The PCR products were then cloned and Sanger sequenced using the ITS1-F primer following the protocol in (Lindner & Banik 2011). Sequence identifications were verified via BLAST search and two clones of each isolate were selected and cultured in liquid LB (Luria-Bertani) media and incubated at 37 C for 24 hours. Plasmids were purified from the cultures in LB media using standard alkaline lysis. These plasmids will hereafter be termed “purified plasmids”. The purified plasmids were then Sanger sequenced with vector primers T7 and SP6 to verify the insertion of a single copy of the appropriate ITS fragment. We subsequently quantified the purified plasmid DNA concentration using a Qubit® 2.0 fluorometer and DNA concentrations were equilibrated to 10 nM using DNA-free molecular grade water. Following equilibration, 5 µl of each purified

plasmid were combined to make an equimolar “biological mock” community of single-copy purified plasmids (BioMock).

PCR has known biases, which are related to different sequence characteristics and are hard to predict in mixed DNA communities of unknown composition. To illustrate the impact of initial PCR bias on the number of reads obtained from each member of a mixed DNA community, we generated individual HTAS-compatible PCR products from each BioMock plasmid which were subsequently mixed (post-PCR) in an equimolar ratio. This was accomplished by PCR amplifying each individual plasmid with the same barcoded primer set. PCR products were purified using E-gel® CloneWell™ 0.8% SYBR® Safe agarose gels (ThermoFisher), quantified using a Qubit® 2.0 fluorometer, and combined into an equimolar mixture post-amplification. This post-PCR combined mock community can be used to examine sequencing error on NGS platforms and is referred to as BioMock-standards.

#### *Non-biological mock community (SynMock)*

We used the well-annotated ribosomal RNA (rRNA) sequence from *Saccharomyces cerevisiae* as a starting point to design ITS-like synthetic sequences. The ITS adjacent regions of small subunit (SSU) and large subunit (LSU) of *S. cerevisiae* were chosen as anchoring points because of the presence of conserved priming sites ITS1/ITS1-F and ITS4. A 5.8S sequence was designed using *S. cerevisiae* as a base but nucleotides were altered so it would be compatible with several primers in the 5.8S region, including ITS2, ITS3, and fITS7. Random sequences were generated with constrained GC content and sequence length for the ITS1 and ITS2 regions. Twelve unique sequences were synthesized (Genescript) and cloned into pUC57 harboring ampicillin resistance. The SynMock sequences and the script to produce them are available in the OSF repository (<https://osf.io/4xd9r/>) as well as packaged into AMPtk distributions. Each plasmid was purified by alkaline lysis, quantified, and an equimolar mixture was created as a template for HTAS library prep.

#### *Preparation of HTAS libraries and NGS Sequencing*

HTAS libraries were generated using a proofreading polymerase, Pfx50 (ThermoFisher), and thermocycler conditions were as follows: initial denaturation of 94°C for 3 min, followed by 11 cycles of [94°C for 30 sec, 60°C for 30 sec (drop 0.5°C per cycle), 68°C for 1 min], then 26 cycles of [94°C for 30 sec, 55°C for 30 sec, and 68°C for 1 min], with a final extension of 68°C for 7 minutes. PCR products were cleaned using either E-gel® CloneWell™ 0.8% SYBR® Safe agarose gels (Life Technologies) or Zymo Select-a-size spin columns (Zymo Research). All

DNA was quantified using a Qubit® 2.0 fluorometer with the high-sensitivity DNA quantification kit (Life Technologies).

A single step PCR reaction was used to create Ion Torrent compatible sequencing libraries, and primers were designed according to manufacturer's recommendations. Briefly, the forward primer was composed of the Ion A adapter sequence, followed by the Ion key signal sequence, a unique Ion Xpress Barcode sequence (10-12 bp), a single base-pair linker (A), followed by the fITS7 primer (Ihrmark et al. 2012). The reverse primer was composed of the Ion trP1 adapter sequence followed by the conserved ITS4 primer (White et al. 1990). Sequencing on the Ion Torrent PGM was done according to manufacturer's recommendations using an Ion PGM™ Hi-Q™ OT2 Kit, an Ion PGM™ Hi-Q™ Sequencing Kit, an Ion PGM™ sequencing chip (316v2 or 318v2), and raw data were processed with the Ion Torrent Suite v5.0.3 with the "--disable-all-filters" flag given to the BaseCaller. Libraries for Illumina MiSeq were generated by a two-step dual indexing strategy. All samples were PCR amplified with Illumina-fITS7 and Illumina-ITS4 primers. PCR products were cleaned and then dual-barcoded using an 8 cycle PCR reaction using the Illumina Nextera Kit and subsequently sequenced using 2 x 300 bp sequencing kit on the Illumina MiSeq at the University of Wisconsin Biotechnology Center DNA Sequencing Facility. All primers utilized in this study are available via the OSF repository (<https://osf.io/4xd9r/>).

#### *Data processing using AMPtk*

AMPtk is publically available at <https://github.com/nextgenusfs/amptk>. All primary data and data analysis done in this manuscript are available via the Open Science Framework (<https://osf.io/4xd9r/>). AMPtk is written in Python and relies on several modules: edlib (Šošić & Šikic 2017), biopython (Cock et al. 2009), biom-format (McDonald et al. 2012), pandas (McKinney), numpy (van der Walt et al. 2011), and matplotlib modules (Hunter 2007). External dependencies are USEARCH v9.1.13 (Edgar 2010) or greater and VSEARCH v2.2.0 (Rognes et al. 2016) or greater. In order to run the DADA2 (Callahan et al. 2016) method R is required along with the shortRead (Morgan et al. 2009) and DADA2 packages. The major steps for processing HTAS data are broken down into i) pre-processing reads, ii) clustering into OTUs, iii) filtering OTU table, and iv) assigning taxonomy.

*Pre-processing reads* – Data structures from Roche 454 and Ion Torrent are similar where reads are in a single file and have a unique barcode at the 5' end of the read followed by the gene-specific priming site; therefore, AMPtk processes reads from these two platforms very

similarly. As a preliminary quality control step, only reads that have a valid barcode and forward primer are retained. Next, reverse primer sequences are removed and reads are trimmed to a user-defined maximum length. Data from Illumina is processed differently because reads are most often paired-end reads and most sequencing centers provide users with de-multiplexed by sample paired-end data (i.e. output of 'bcl2fastq'). AMPtk first merges the paired end reads using USEARCH or VSEARCH, phiX spike-in control is removed with USEARCH, forward and reverse primers are removed if found, and all data are combined into a single file. Pre-processing reads in AMPtk from any of the sequencing platforms results in a single output file that is compatible with all downstream steps.

*Clustering reads into OTUs* – AMPtk is capable of running several different clustering algorithms including UPARSE, DADA2, UNOISE2, UNOISE3, and reference-based clustering. The algorithms all start with quality filtering using expected errors trimming and are modified slightly in AMPtk to build OTU tables using the original de-multiplexed data; therefore read counts represent what was in the sample prior to quality filtering. This is an important distinction, as expected errors quality trimming (Edgar & Flyvbjerg 2015) can be rather stringent if long read lengths are used and the amplicons are of variable length.

*Index-bleed filtering of OTU tables* – Filtering in AMPtk works optimally when a spike-in mock community is sequenced in the dataset. While by default AMPtk is setup to work with the SynMock described herein, any spike-in mock community can be used. AMPtk identifies which OTUs belong to the mock community and calculate index-bleed of that mock community into other samples as well as bleed into the mock community from samples. This calculated index-bleed percentage is then used to filter the OTU table. Filtering is done on a per OTU basis, such that read counts in each OTU that are below the index-bleed threshold are set to zero as they fall within the range of data that could be attributed to index-bleed and read counts above the threshold are not changed.

*Assigning taxonomy* - AMPtk is pre-configured with databases for fungal ITS, fungal LSU, arthropod mtCO1, and prokaryotic 16S; however custom databases are easily created with the 'ampatk database' command. Several tools are available for taxonomy assignment in AMPtk including remote blast of the NCBI nt database, RDP Classifier (Wang et al. 2007), global alignment to a custom sequence database, UTX Classifier (RC Edgar, [http://drive5.com/usearch/manual9.2/cmd\\_ntax.html](http://drive5.com/usearch/manual9.2/cmd_ntax.html)), and the SINTAX Classifier (Edgar 2016).



The default method for taxonomy assignment in AMPtk is a “hybrid” approach that uses classification from global alignment, UTAX, and SINTAX. The best taxonomy is then chosen as follows: i) if global alignment percent identity is > 97% then the top hit is retained, ii) if global alignment percent identity is < 97%, then the best confidence score from UTAX or SINTAX is used, iii) if there is disagreement between taxonomy levels assigned by each method then a least common ancestor (LCA) approach is utilized to generate a conservative estimate of taxonomy. AMPtk also can take a QIIME-like mapping file that can contain all the metadata associated with the HTAS study; the output is then a multi-fasta file containing taxonomy in the headers, a classic OTU table with taxonomy appended, and a BIOM file incorporating the OTU table, taxonomy, and metadata. The BIOM output of AMPtk is compatible with several downstream statistical and visualization software packages such as PhyloSeq (McMurdie & Holmes 2013).

*Accessory scripts in AMPtk* - AMPtk has several additional features that will aid the user in analyzing HTAS data. For instance, AMPtk contains a script that will prepare data for submission to the NCBI SRA archive by formatting it properly and outputting a ready-to-submit SRA submission file. The FunGuild (Nguyen et al. 2016) package which assigns OTUs to an annotated database of functional guilds is also incorporated directly into AMPtk. Additionally, users can draw a heatmap of an OTU table as well as summarize taxonomy in a stacked histogram.

## Results

### *In silico analysis of the fungal ITS region*

To gain baseline data on potential amplicons of the ITS1 or ITS2 regions, the ITS1 and ITS2 regions were extracted using priming sites specific for each region (ITS1: ITS1-F and ITS2; ITS2: fITS7 and ITS4) from the UNITE+INSD v7.2 database (Abarenkov et al. 2010) consisting of 736,375 ITS sequences. For comparison, the commonly sequenced V3-V4 region was extracted from prokaryotic 16S sequences from the Silva v128 database (Quast et al. 2013). A length histogram for each dataset as well as summary statistics were generated (Figure 1B; Table 1), indicating that all three of these molecular barcodes have an average length of ~ 250 bp (Table1); however, there was considerable variation in the lengths of the ITS region in comparison to the V3/V4 region of 16S (Figure 1B). Stretches of homopolymer sequences can also be problematic for some NGS platforms (454 and PGM), and thus the number of sequences in this dataset that contained homopolymer stretches greater than 6

nucleotides were calculated (Table 1). Given the small percentage of ITS1 and ITS2 regions that are greater than 450 bp (the current upper limit of the Ion Torrent PGM platform), the number of taxa in the reference database that are unlikely to sequence on the Ion Torrent due to amplicon length is relatively small (Table 1). Illumina MiSeq is now capable of paired end 300 bp read lengths (2 x 300); however, reads need to overlap for proper processing in NGS software platforms and thus a ~ 500 bp size limit would also be able to sequence most taxa in the reference database using either the ITS1 or ITS2 region.

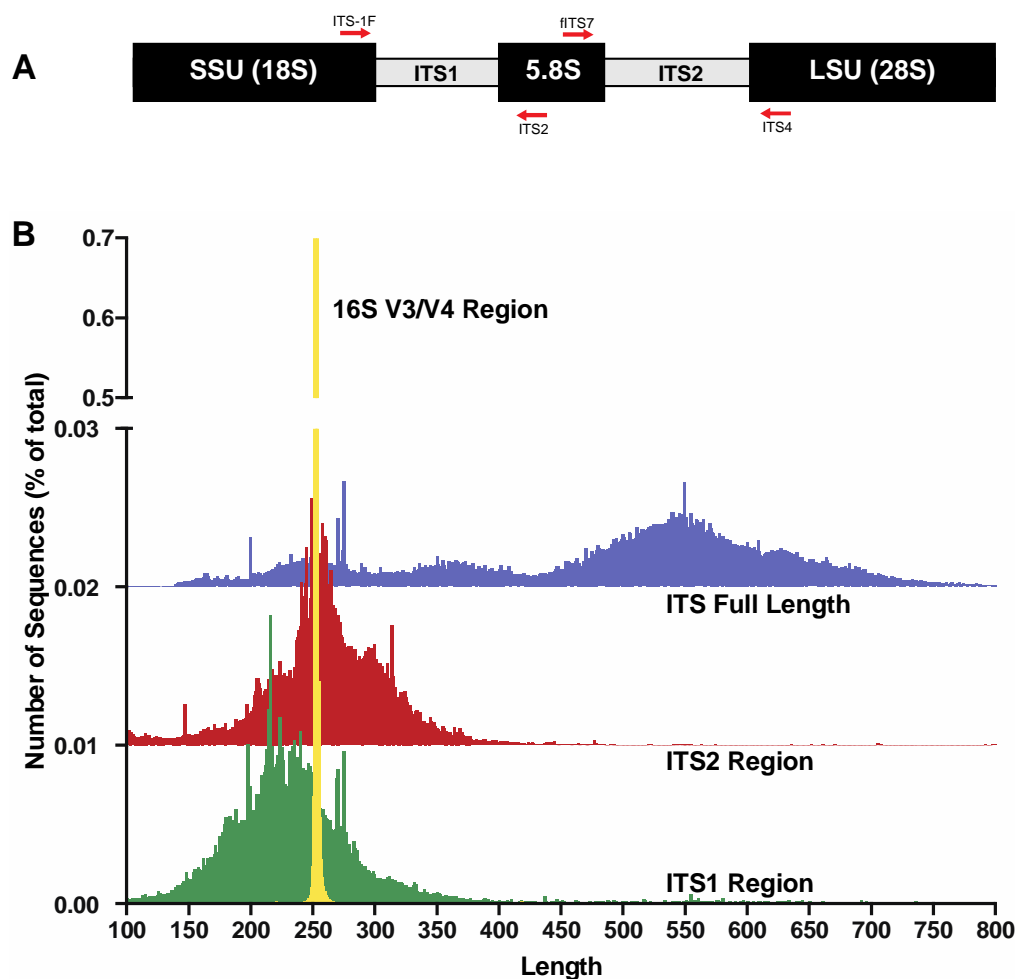

**Figure 1.** The fungal internal transcribed spacer (ITS) region of the rRNA array is highly variable in length. (A) A schematic of the rRNA array highlights the conserved priming sites commonly used to amplify either the ITS1 or ITS2 region. (B) Size distribution of full length ITS (blue), ITS1 (green), ITS2 (red) sequences in the UNITE v7.2 curated databases shown in comparison to the bacterial 16S V3/V4 amplicon from the Silva v128 database. Current sequencing technologies do not have read lengths long enough to capture full-length ITS sequences, and thus ITS1 or

ITS2 regions are used for fungal environmental community analysis. 16S V3/V4 in yellow; ITS full length in blue, ITS2 in red, and ITS1 in green.

Table 1. Summary statistics of the fungal ITS molecular barcode in comparison to bacterial 16S.

| Region          | Num<br>Seqs | Avg Length (bp) | % HP <sup>1</sup> > 6 | % HP <sup>1</sup> > 8 | % > 450 bp |
|-----------------|-------------|-----------------|-----------------------|-----------------------|------------|
| ITS Full Length | 696 704     | 488             | 55.07%                | 8.66%                 | -          |
| ITS1            | 685 399     | 247             | 36.58%                | 5.60%                 | 3.27%      |
| ITS2            | 535 200     | 264             | 44.19%                | 5.54%                 | 0.83%      |
| 16S (V3/V4)     | 627 247     | 253             | 23.74%                | 1.02%                 | -          |

<sup>1</sup> HP: homopolymer stretches

### *Creation of a representative artificial fungal mock community (BioMock)*

Given the results from analysis of the UNITE datasets, we set out to create a representative ITS mock community to be used as a spike-in sequencing control to determine the quantitative nature of ITS HTAS and to measure the performance between the commonly used Illumina MiSeq platform versus the Ion Torrent PGM. To circumvent the problematic issues associated with the ITS region, we reasoned that cloned ITS sequences in plasmid form would allow for accurate quantification and pooling, thus providing a means to test the accuracy of the sequencer platforms and data processing workflows. We cloned known ITS sequences from 26 cultures from the CFMR culture collection that varied in length (237 bp to 548 bp), ranged in GC content (43.8% - 68.4%), and contained sequences with homopolymer stretches with one sequence containing two 9 bp stretches. These plasmids were combined into BioMock and BioMock-standards as described in materials and methods section. The value of the BioMock-standards is that the library was combined after PCR, and thus the standards are free from PCR-induced artifacts that may arise from PCR of a mixed community.

### *Existing data processing workflows perform poorly with fungal ITS sequences*

Clustering amplicons into operational taxonomic units (OTUs) is common practice in molecular ecology and there are many software solutions/algorithms (such as QIIME (Caporaso et al. 2010), UPARSE (Edgar 2013), Mothur (Schloss et al. 2009), and DADA2 (Callahan et al. 2016)) that have been developed to deal appropriately with errors associated with next-generation sequencing platforms. Many studies using 16S amplicon data have focused on comparing clustering methods (Callahan et al. 2016; Edgar 2013), while others have focused on quality filtering reads prior to clustering (Edgar & Flyvbjerg 2015). Therefore, we chose not to compare the different software algorithms in this study but will briefly mention that when we did

run our data through QIIME, the number of OTUs was highly over-estimated and the error rates were very high (Supporting Information Table S2). We were unable to run our data through Mothur due to the inability to do a multiple sequence alignment and subsequent distance matrix of the ITS region. The best performing clustering pipeline was UPARSE; however there were several issues with how the reads were pre-processed and quality filtered that lead to suboptimal results (Supporting Information Table S3 and Table S4). It is important to note that all of these software solutions have been built with 16S amplicons in mind and several have been optimized for Illumina data.

The major difference in 16S amplicons versus those of ITS1/ITS2 is that the lengths of 16S amplicons are nearly identical, while ITS1/ITS2 amplicons vary in length (Figure 1B). This distinguishing feature makes ITS sequences from diverse taxa impossible to align (Schoch et al. 2012) and thus represents a major limitation in data processing. To illustrate the importance of properly pre-processing ITS data, we clustered the ITS1 and ITS2 regions using UPARSE while using the full length ITS1/ITS2 UNITE reference database as a benchmark (Figure 2). Using the UNITE database, we then explored the outcome of trimming/truncating the sequences to different length thresholds, a common practice in OTU clustering pipelines. The UPARSE algorithm uses global alignment and as such terminal mismatches count in the alignment (as opposed to local alignment where terminal mismatches are ignored); thus the UPARSE pipeline expects that reads are truncated to a set length. UPARSE achieves this by truncating all reads to a set length threshold and discards reads that are shorter than the length threshold. Therefore real ITS sequences are discarded (Figure 2). We then came up with two potential solutions to fix this unintended outcome: i) truncate reads that were longer than the threshold and keep all shorter reads (full length), and ii) truncate longer reads and pad the shorter reads with N's out to the length threshold (padding). Using the UNITE v7.2 database of curated sequences (general release June 28<sup>th</sup>, 2017) as input, both "full-length" and "padding" improved UPARSE results with the "full length" method recovering more than 99% of the expected OTUs (Figure 2).

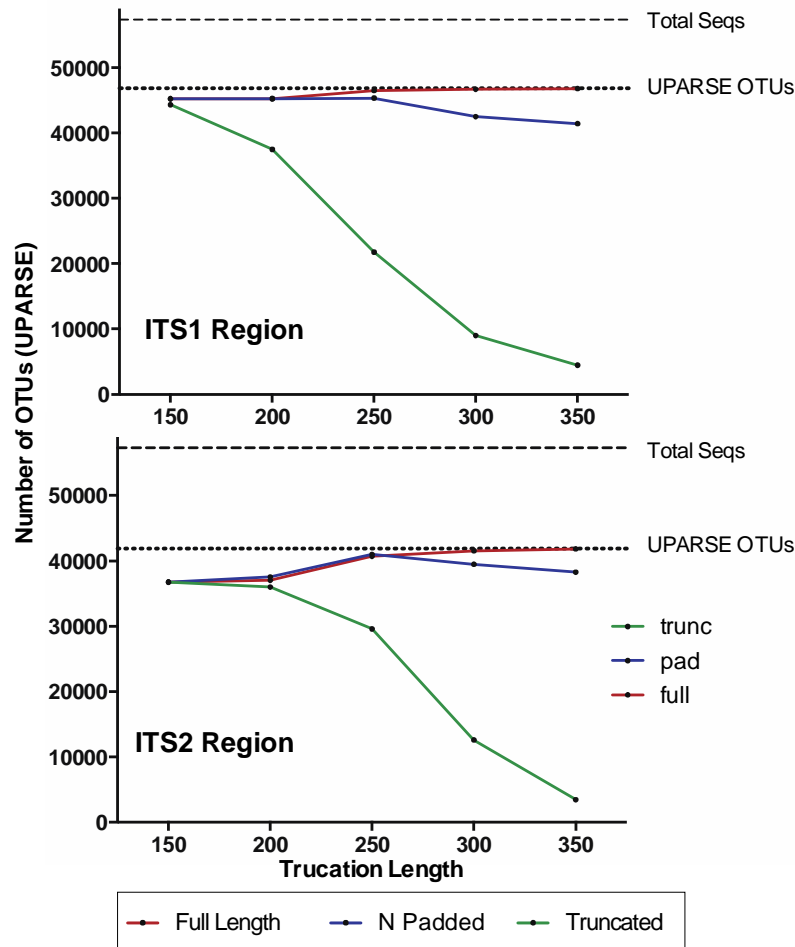

**Figure 2.** Pre-processing ITS sequences is critically important to accurately recover OTUs using the curated UNITE v7.2 reference database. ITS1 and ITS2 sequences were extracted from the UNITE v7.2 general fasta release database using 'AMPTk database'. Identical sequences were collapsed (dereplication) and remaining sequences were clustering using UPARSE ('cluster\_otus') to generate the total number of UPARSE OTUs expected for the ITS1 and ITS2 regions. The data was then processed to five different lengths (150, 200, 250, 300, and 350 bp) and then clustered (UPARSE 'cluster\_otus') using i) default UPARSE truncation (longer sequences are truncated and shorter sequences are discarded), ii) padding with ambiguous bases (longer sequences truncated and shorter sequences padded with N's to length threshold), and iii) full-length sequences (longer sequences are truncated and shorter sequences are retained if reverse primer is found). Full-length and padding pre-processing sequences outperforms default UPARSE truncation.

Due to the intrinsic nature of the variable length ITS amplicons, we needed a data processing solution that would be flexible enough to maintain the full length of the reads, trim reads without data loss, prepare sequencing reads for downstream clustering algorithms, and support all major NGS platforms. Using the BioMock communities as a means to validate the results of all data processing steps, we wrote a flexible series of scripts for processing Illumina, Ion Torrent, as well as Roche 454 data that are packaged into AMPtk ([amplicon tool kit](#)). A flow diagram of AMPtk is illustrated in Figure 3 and a more thorough description of AMPtk is provided in the material and methods section. A manual for AMPtk is available at <http://amptk.readthedocs.io/en/latest/>. After data is pre-processed with AMPtk via a platform specific method, AMPtk then functions as a wrapper for several popular algorithms including UPARSE, DADA2, UNOISE2, and UNOISE3. All data presented in this manuscript were processed with AMPtk v1.0.1.

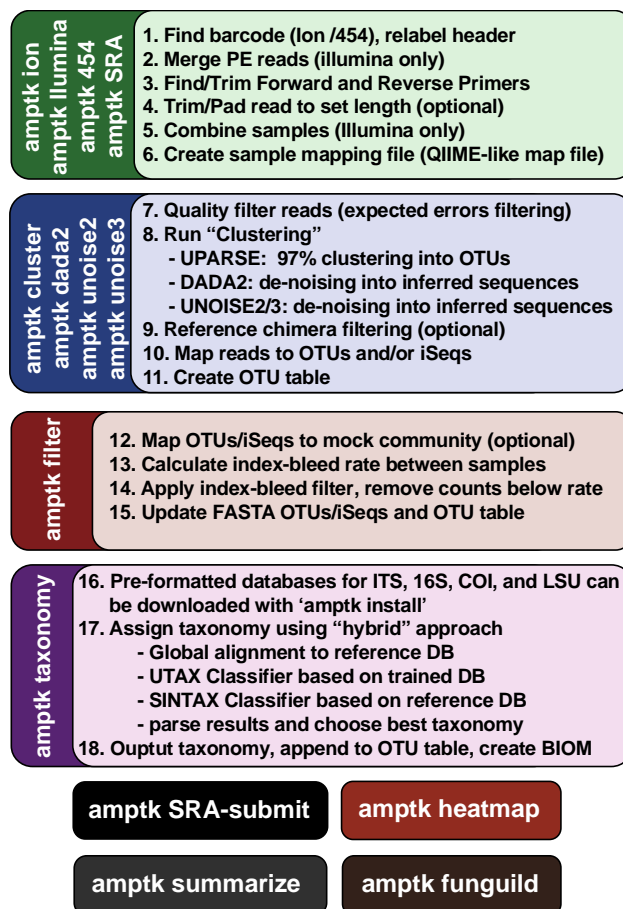

**Figure 3.** Overview of the commands in AMPtk. AMPtk is built to be compatible with multiple sequencing platforms as well as contains several clustering algorithms.

### *Read abundances do not represent community abundances: PCR introduces bias*

Next-generation sequencing platforms are quantitative if the library to be sequenced is unbiased, as is typically the case with RNA-sequencing and whole genome sequencing library prep protocols. However, PCR of mixed communities has long been shown to introduce bias in next-generation sequencing workflows (Aird et al. 2011; Kobschull & Zador 2015; Pinto & Raskin 2012). For HTAS this is an important caveat, as molecular ecologists are interested in diversity metrics of environmental communities as well as their relative abundance. Through the use of mock communities, several studies have pointed out that read abundance from fungal HTAS are not representative of relative biological abundance (Amend et al. 2010; De Filippis et al. 2017). However, it was recently reported that for a fungal ITS mock community of 8 members, abundances were meaningful (Taylor et al. 2016) and many studies continue to use abundance-based metrics to analyze HTAS, without giving any consideration to presence/absence-based metrics. We reasoned we could investigate this issue using the ITS BioMock artificial community, which would not suffer from bias associated with DNA extraction, ITS copy numbers, and intraspecific variation. We compared the relative read abundances of BioMock-standards to 3 different combinations of BioMock on both the Ion Torrent PGM and Illumina MiSeq platforms (Figure 4). The BioMock-standards consist of an equimolar mixture of 26 PCR products thereby removing the PCR bias from mixed DNA samples, while the BioMock communities consist of an equimolar mixture of 23 single-copy plasmids. These data show that even in an extreme example of an equally mixed community of cloned ITS sequences, read abundance does not represent actual abundance in the mock community (Figure 4). The majority of the bias is introduced at the initial PCR step, as the pre-PCR combined BioMock-standards result in a more equal distribution of reads, albeit not a perfect distribution. We also tested PCR conditions, DNA concentrations, and sample reproducibility on the Ion Torrent PGM (Supporting Information Figure S1). While the bias via PCR is consistent between sequencing platforms, there is no obvious correlation between length of the read, GC content, nor stretches of homopolymers affecting efficient PCR amplification. For example, *Wolfiporia dilatophya* (mock11) contains no homopolymer stretches larger than 5, has GC distribution of 54.6%, and is near the median in length, yet it does not PCR amplify well in the BioMock community (Figure 4). These data also show a size limitation in the Ion Torrent PGM workflow, as *Wolfiporia cocos* (mock 26) sequences very poorly due to its long ITS2 region (Figure 4). Three members of the original 26 members of the BioMock community were dropped (mock24, mock25, mock26) due to persistent problems getting them to amplify/sequence in repeated HTAS on the Ion Torrent platform (Supporting Information Figure S1).

| Species                           | ITS2 Length | GC Content | HP > 5 | ID     | Ion Torrent PGM |        |         |         | Illumina MiSeq |        |         |         |
|-----------------------------------|-------------|------------|--------|--------|-----------------|--------|---------|---------|----------------|--------|---------|---------|
|                                   |             |            |        |        | Stds            | Mock A | Mock B1 | Mock B2 | Stds           | Mock A | Mock B1 | Mock B2 |
| <i>Phialocephala fusca</i>        | 237         | 68.4%      | 0      | mock1  | 4905            | 19     | 6       | 1       | 8615           | 725    | 329     | 3337    |
| <i>Ascomycete sp.</i>             | 238         | 50.8%      | 0      | mock2  | 5106            | 11651  | 10809   | 11877   | 9174           | 20763  | 26129   | 18341   |
| <i>Phialocephala lagerbergii</i>  | 238         | 58.8%      | 0      | mock3  | 4886            | 13479  | 12111   | 13392   | 8648           | 28515  | 29482   | 21269   |
| <i>Helotiales sp.</i>             | 239         | 57.3%      | 0      | mock4  | 4233            | 15219  | 13048   | 14896   | 9050           | 27726  | 32576   | 24276   |
| <i>Aspergillus candidus</i>       | 260         | 65.8%      | 3      | mock5  | 2813            | 31     | 23      | 3       | 8992           | 147    | 122     | 269     |
| <i>Bjerkandera adusta</i>         | 281         | 51.2%      | 0      | mock6  | 3977            | 8112   | 7172    | 7787    | 13597          | 13112  | 13866   | 15067   |
| <i>Laetiporus caribensis</i>      | 283         | 52.7%      | 0      | mock7  | 3330            | 7810   | 6457    | 6365    | 9404           | 15035  | 16622   | 16385   |
| <i>Trametes gibbosa</i>           | 288         | 50.0%      | 1      | mock8  | 3637            | 7281   | 6914    | 6865    | 8137           | 13819  | 14579   | 14787   |
| <i>Laetiporus gilbertsonii</i>    | 290         | 54.1%      | 0      | mock9  | 4066            | 8831   | 10401   | 12638   | 8751           | 22860  | 21680   | 20682   |
| <i>Gloeoporus pannocinctus</i>    | 292         | 43.8%      | 0      | mock10 | 2603            | 2922   | 3025    | 2567    | 9718           | 11150  | 11792   | 14265   |
| <i>Wolfiporia dilatohypha</i>     | 293         | 54.6%      | 0      | mock11 | 3957            | 94     | 110     | 109     | 8775           | 243    | 224     | 194     |
| <i>Schizopora sp.</i>             | 293         | 48.1%      | 0      | mock12 | 4037            | 6965   | 7030    | 6626    | 8676           | 12857  | 13947   | 14860   |
| <i>Fomitopsis ochracea</i>        | 295         | 44.1%      | 0      | mock13 | 3689            | 2913   | 2860    | 2651    | 9471           | 5522   | 5432    | 6883    |
| <i>Laetiporus cremeioporos</i>    | 296         | 54.7%      | 0      | mock14 | 3922            | 10279  | 11920   | 12440   | 8262           | 16454  | 16390   | 16798   |
| <i>Phanerochaete laevis</i>       | 300         | 47.7%      | 1      | mock15 | 3863            | 6970   | 7650    | 6876    | 9242           | 15667  | 15543   | 18168   |
| <i>Laetiporus cincinnatus</i>     | 302         | 54.0%      | 0      | mock16 | 3133            | 5699   | 7645    | 7505    | 7675           | 16819  | 16157   | 14608   |
| <i>Punctularia strigosozonata</i> | 303         | 53.1%      | 0      | mock17 | 4019            | 8271   | 7688    | 8217    | 7669           | 10701  | 11572   | 11671   |
| <i>Phellinus cinereus</i>         | 314         | 49.7%      | 0      | mock18 | 3672            | 2937   | 2985    | 2597    | 9807           | 6314   | 5953    | 7496    |
| <i>Antrodiaella semisupina</i>    | 315         | 43.8%      | 1      | mock19 | 3089            | 3047   | 3406    | 2741    | 9297           | 9356   | 8990    | 11593   |
| <i>Leptoporus mollis</i>          | 315         | 45.4%      | 3      | mock20 | 3551            | 4969   | 4320    | 4028    | 9047           | 8847   | 8747    | 9987    |
| <i>Leptoporus mollis 2</i>        | 315         | 45.1%      | 1      | mock21 | 3776            | 207    | 366     | 249     | 9250           | 405    | 302     | 414     |
| <i>Mortierellales sp.</i>         | 353         | 45.0%      | 0      | mock22 | 3264            | 4668   | 4311    | 3812    | 9151           | 10865  | 9728    | 13365   |
| <i>Laetiporus persicinus</i>      | 379         | 51.2%      | 2      | mock23 | 2147            | 2651   | 2385    | 2053    | 6486           | 488    | 421     | 521     |
| <i>Penicillium nothofagi</i>      | 260         | 66.2%      | 1      | mock24 | 3644            | NA     | NA      | NA      | 8278           | NA     | NA      | NA      |
| <i>Metapochonia suchlasporia</i>  | 291         | 64.6%      | 1      | mock25 | 1976            | NA     | NA      | NA      | 2045           | NA     | NA      | NA      |
| <i>Wolfiporia cocos</i>           | 548         | 59.7%      | 0      | mock26 | 7               | NA     | NA      | NA      | 5979           | NA     | NA      | NA      |

**Figure 4.** Read abundance is an unreliable proxy for actual abundance within a mixed community. Using an equimolar mixture of cloned ITS sequences in plasmid form (MockA, MockB1, MockB2) in comparison to equimolar mixture of individual PCR products (Stds) illustrates that the initial PCR reaction during library preparation heavily biases the read abundance obtained after sequencing on both the Ion Torrent PGM and Illumina MiSeq platforms. While read abundances are unreliable, all members of the mock community were recovered. MockA represents a 1:16,000 dilution and MockB1/MockB2 are replicates of a 1:32,000 dilution of the BioMock community. The Ion Torrent PGM platform has a length threshold of approximately 450 bp; therefore longer amplicons like *Wolfiporia cocos* ITS2 sequence very poorly.



In HTAS experiments, considerable effort is made to try to sequence to an equal depth for each sample. However, in practice this rarely works perfectly and thus a typical HTAS dataset has a 2-4X range in number of reads per sample. The depth of sequence range for the HTAS runs presented here is within a range of 2X for each run and the smallest number of reads per sample in any of our sequencing runs was nearly 60,000 (Supporting Information Table S5). Unequal sequencing depth has been used as rationale for explaining the lack of correlation between read abundance and actual abundance. Therefore, random subsampling of reads in each sample prior to clustering (also called rarefying) has been widely used in the literature, despite a compelling statistical argument that this method is flawed (McMurdie & Holmes 2014). Randomly subsampling reads for each sample using our BioMock community yielded nearly identical results (Supporting Information Figure S2). Sequencing depth has been shown to be an important variable for HTAS experiments (Smith & Peay 2014), therefore we typically employ a 5,000 reads per sample cutoff when processing environmental datasets.

#### *A non-biological synthetic mock community to measure index-bleed among samples*

Index-bleed is a phenomenon that has been described on Roche 454 platform (Carlsen et al. 2012) as well as Illumina platforms (Kircher et al. 2012; Wright & Vetsigian 2016). A consensus on a mechanism of index-bleed during the sequencing run has yet to be reached. Index-bleed is a significant challenge to overcome as sample crossover has the potential to over-estimate diversity and lead to inaccurate representations of microbial communities, especially considering that read abundance is an unreliable proxy for biological abundance (Figure 4). Using our BioMock sequencing results, we also discovered this phenomenon on both Ion Torrent and Illumina platforms. We calculated the rate of index-bleed in our BioMock Ion Torrent sequencing run to be 0.033% and on Illumina MiSeq between 0.233% and 0.264%. We also confirmed that index-bleed was happening on the Illumina flow-cell by re-sequencing a subset of Illumina libraries that had shown high index-bleed on the first MiSeq flowcell that did not contain the BioMock (Supporting Information Figure S3). One problem that we noticed in measuring index-bleed using a mock community of actual ITS sequences (BioMock) was that these same taxa in the mock community could be present in environmental samples, which would lead to inaccurate estimation of index-bleed. In our environmental data, it was likely that at least one of the BioMock members was present in several of the environmental samples, suggesting the calculated index-bleed could be over-estimated. To overcome this problem, we designed a non-biological (synthetic) mock community composed of ITS-like sequences that contained conserved priming sites (SSU and LSU regions), ITS1 region, 5.8S region, and an

ITS2 region (Figure 5). We designed the ITS1 and ITS2 portions of the sequences to be non-biological; that is, no similar sequences are known to occur in nature (based on searches of known databases and based on the infinitesimally low probability that a randomly generated sequence would match something found in nature) and therefore these non-biological sequences can be used to accurately track index-bleed in HTAS studies. Using the summary statistics from the analysis of the UNITE reference database for guidance, we also varied the length, GC content, and homopolymer stretches to be representative of real ITS sequences.

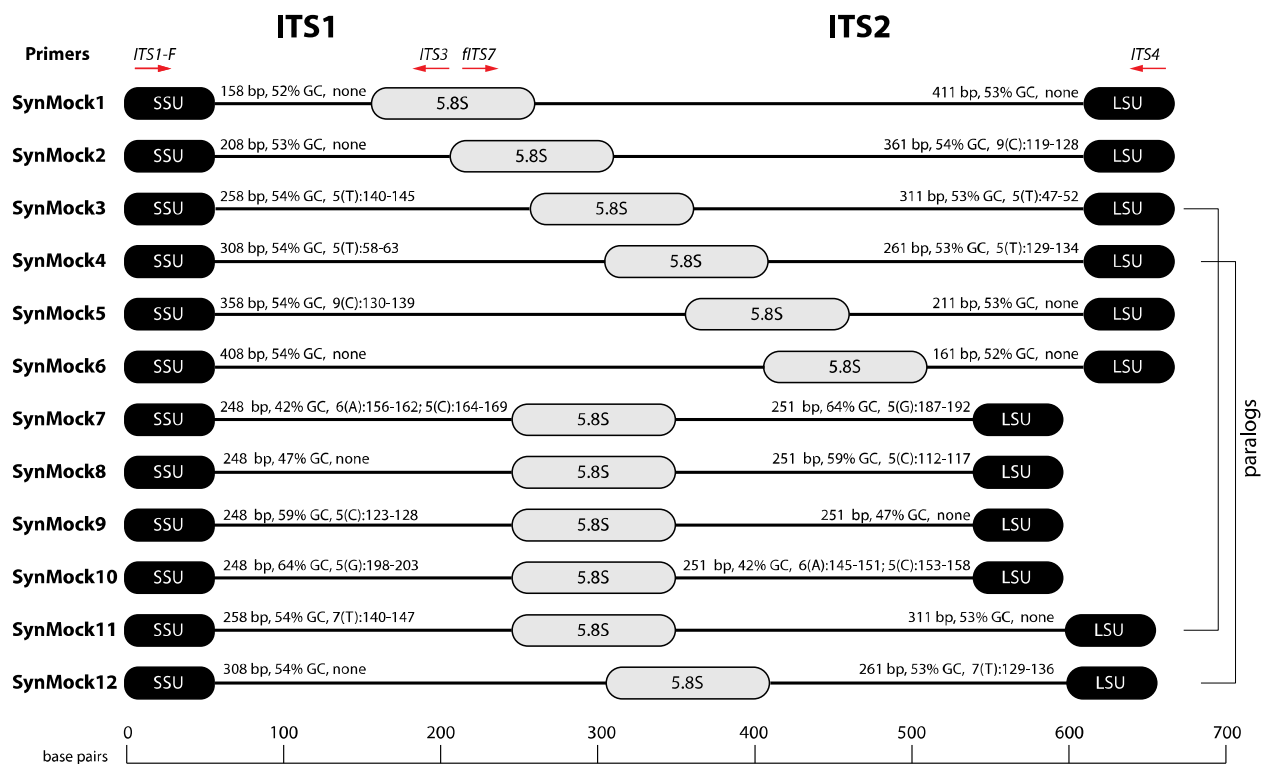

**Figure 5.** Schematic drawing of the 12-member non-biological synthetic mock community (SynMock). Conserved priming sites for either ITS1 or ITS2 amplicons are retained for versatility. The length distribution, GC content, and homopolymer stretches are representative of curated public databases; however, the sequences are non-biological and thus not found in nature.

The SynMock was tested as a spike-in control on both the Ion Torrent and Illumina MiSeq platforms. The raw data were processed using AMPtk and clustered using UPARSE. These data illustrate that the synthetic sequences are able to be processed simultaneously with real ITS sequences and provide a way to track the level of index-bleed between multiplexed samples (Figure 6). The increased benefit of being able to track the SynMock sequences as

they “bleed” out of the sample allows for a more accurate measurement of index-bleed. Using default Illumina de-multiplexing (allowing 1 mismatch in the index sequence), index-bleed using the SynMock community was 0.072% (Figure 6C). To determine if allowing mismatches in the index reads was increasing index-bleed, we reprocessed the data with 0 mismatches and found that index-bleed was reduced to 0.046%. While index-bleed was reduced by nearly half, the tradeoff was that 0 mismatches resulted in approximately 10% fewer reads. For most datasets, a loss of 10% of the sequencing reads should not be problematic, especially if the benefit is to reduce index-bleed in the data. We noted that in our Illumina dual-indexing library prep that there was increased index-bleed on samples that had a shared reverse index (i7), suggesting that errors are increased at later stages of an Illumina sequencing run (Figure 6B). A similar pattern of increased index-bleed correlating with relaxed primer mismatch settings was observed with Ion Torrent PGM data, although not as drastic. Allowing 1 mismatch in the barcode resulted in 0.167% index-bleed while allowing 0 mismatches in the barcode resulted in 0.156% index-bleed (Figure 6C). While these data would suggest that index-bleed is perhaps higher in Ion Torrent PGM datasets, we have subsequently used the SynMock on more than 10 different HTAS Ion Torrent PGM experiments and have since seen much lower levels of index-bleed, occasionally approaching 0% index-bleed.

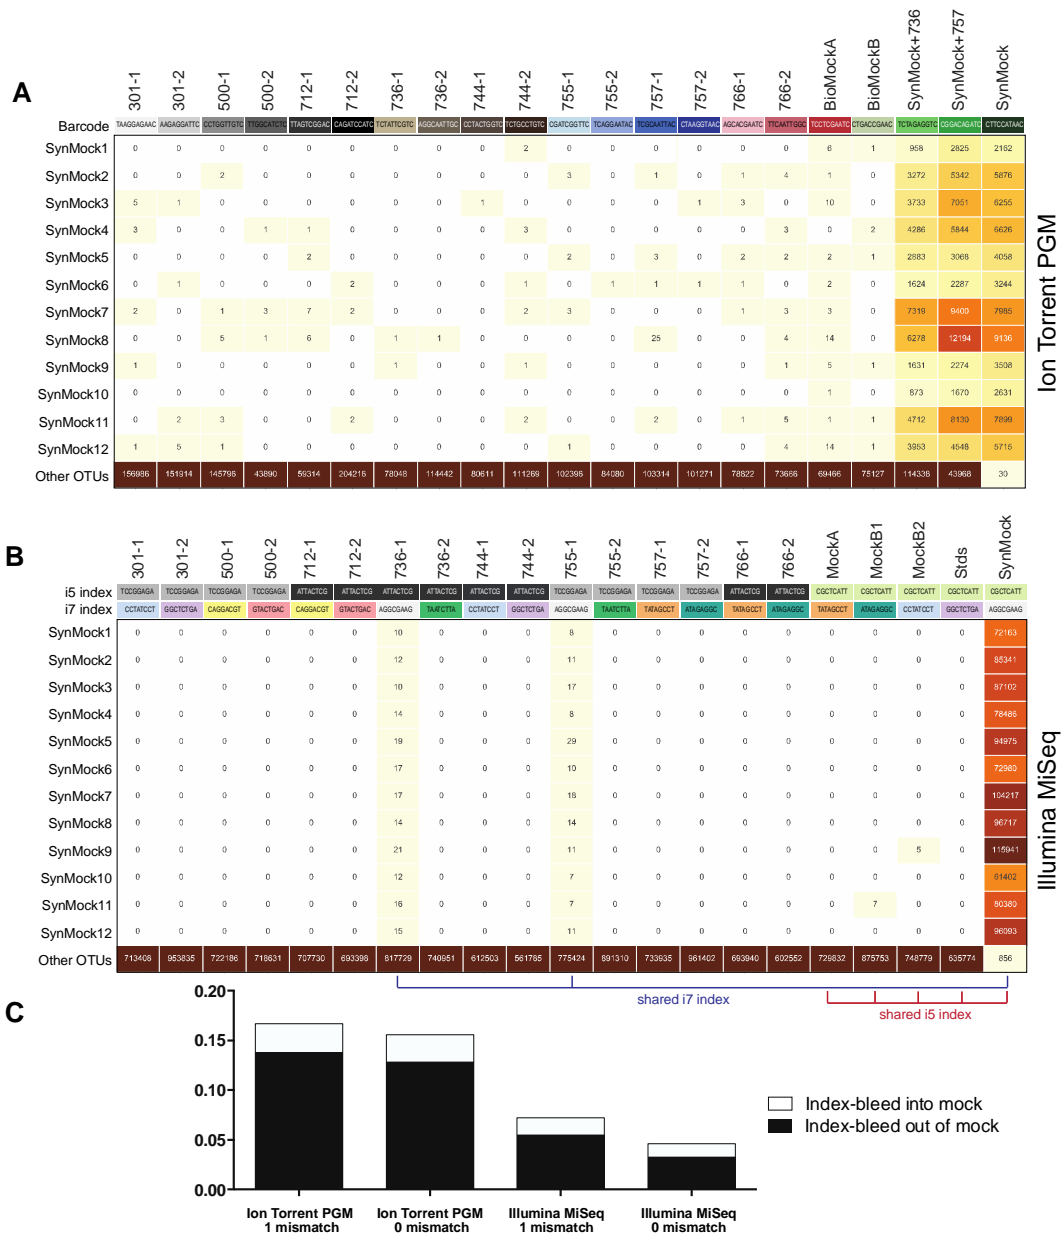

**Figure 6.** Index-bleed or sample mis-assignment occurs on both Ion Torrent PGM and Illumina MiSeq. (A) Read counts from the SynMock community run on the Ion Torrent PGM platform. SynMock reads can be found in environmental samples and reads from the environmental samples are found in the SynMock sample. The data were processed allowing 0 mismatches in the barcode sequence and there is no clear pattern to index-bleed on the Ion Torrent PGM platform. (B) Data processed on the Illumina MiSeq (2x300) allowing 0 mismatches in the index reads show index-bleed in and out of the SynMock sample. Samples that share an index (i5 or i7) show an increase in index-bleed. (C) Index-bleed between samples can be tracked using the SynMock spike-in control, where AMPtk will measure both index-bleed into the SynMock as well

as index-bleed into other samples. These calculated values are then used by AMPtk to filter an OTU table to remove read counts that fall below the index-bleed threshold. Index-bleed is reduced if 0 mismatches are allowed in the barcode/index sequence, however, this is still not sufficient to eliminate index-bleed.

Many environmental samples can contain hundreds of taxa and thus a legitimate concern is that the 12 member SynMock community does not represent a realistic community in terms of diversity in a sample. To test if the SynMock was able to be recovered in a more complex community, we mixed SynMock together with two environmental samples that had more than 200 OTUs in previous sequencing runs. These mixed samples show that SynMock could be recovered from a complex community and the sequences behave like real ITS sequences (Figure 6A). While many studies have set a read count threshold to filter “noisy” data from OTU tables, this threshold has been typically selected arbitrarily, i.e. OTUs with read counts less than 100 or less than 10% of the total, etc. Use of the SynMock spike-in control allowed for data-driven thresholds to be measured and moreover for the ability to filter the OTU table based on the calculated index-bleed. The AMPtk filter command calculates index-bleed by mapping the OTUs to the mock community and then provides a way to filter the OTU table based on this calculated value. AMPtk filters across each OTU in the table such that difficult to sequence or “low abundance” OTUs are not indiscriminately dropped. Taken together, these data illustrate the utility of a non-biological mock community in parameterizing data processing steps and importantly providing a method in AMPtk to reduce index-bleed from HTAS datasets. AMPtk provides an easy to use method to accurately process variable length amplicons, cluster them into OTUs or denoise sequences, generate an OTU table, filter the OTU table for index-bleed, and assign taxonomy.

## **Discussion**

Many HTAS studies have the goal of measuring and comparing biological diversity in environmental samples; however, there are technical limitations that need to be understood in order to reach justifiable conclusions. Mock communities and negative controls have been shown to have great utility for HTAS studies, and expanding upon this concept, we present a non-biological synthetic mock community of ITS-like sequences for use as a technical spike-in control for fungal biodiversity studies. Additionally, we describe AMPtk, a software tool kit for analyzing variable length amplicons such as the fungal ITS1 or ITS2 molecular barcodes. These two tools can be coupled together to validate data processing pipelines and reduce index-bleed

from OTU tables prior to downstream community ecology analyses. The concept of a non-biological synthetic spike-in control can be expanded to many different genes and organisms, as was recently described for 16S for microbiome studies (Tourlousse et al. 2017).

The ITS region is widely used as a molecular barcode in fungal biodiversity studies as it is easy to amplify and public reference databases are robust. However, HTAS with the ITS region presents some unique challenges due to variability in sequence characteristics such as length and copy number. Most HTAS software development and optimization has been focused on the 16S molecular barcode, a region that is near uniform in length across prokaryotic taxa. Thus, there is a need for a software solution that can more accurately account for variable length amplicons. We developed a single-copy mock community based on cloned ITS sequences as a tool to validate and compare different NGS platforms and data processing pipelines. Using an artificial single-copy mock community of cloned ITS sequences in plasmids (BioMock), we determined that the core clustering/denoising algorithms work for variable length amplicons; however, pre-processing techniques widely used for uniform length amplicons introduce significant error into the pipelines. Simplifying the pre-processing of sequencing reads (i.e., identifying unique sequence barcodes, forward/reverse primers, and trimming reads to a uniform length without data loss) resulted in large improvement in downstream OTU clustering. The pre-processing of reads prior to quality filtering is critical for variable length amplicons and is implemented in AMPtk.

Proper pre-processing of variable length amplicons improves clustering results substantially. However, the BioMock results illustrated that read abundances obtained from HTAS are not a reliable proxy for inferring biological relative abundance, demonstrating additional assays such as qPCR are required to capture biological relative abundance. These data do support use of presence/absence (binary) metrics as we were able to recover all members of our mock community, even when they were spiked into a diverse environmental sample. We identified the initial PCR reaction (library construction) as the major source of read number bias, a conclusion consistent with the literature (Jusino et al. 2017; Polz & Cavanaugh 1998; Wu et al. 2010). To reduce PCR artifacts for any assay it is generally accepted that one should use the fewest cycles possible, the most concentrated DNA possible, and it has been suggested to use a proofreading polymerase (Oliver et al. 2015). We have tested DNA concentration and PCR cycle numbers for HTAS library generation and subsequent sequencing on the Ion Torrent PGM platform, and our results were consistent with these general guidelines (Supporting Information Figure S1). However, following these guidelines is not sufficient to reduce the bias in read abundance from a mixed community from PCR. The Ion Torrent PGM

platform currently has an amplicon size limit of ~ 450 bp, and thus some very large ITS sequences are difficult to sequence. However, there are only a small number of known ITS1 or ITS2 sequences that are longer than 450 bp (Table 1) and therefore either platform, Ion Torrent or MiSeq, provided similar results under the conditions tested.

Index-bleed has recently been acknowledged by Illumina (<https://tinyurl.com/illumina-hopping>), although they limit their acknowledgement to a new flow cell on the HiSeq and NovaSeq platforms. Several studies have shown that older instruments/flowcells have also shown index-bleed, albeit at a much lower rate (Kircher et al. 2012; Wright & Vetsigian 2016) and index-bleed has been identified on Roche 454 (Carlsen et al. 2012). Here we report a low rate of index-bleed on both Ion Torrent and Illumina MiSeq platforms. While the effective rate of index-bleed is low (< 0.2%), coupled with the fact that read number is not a reliable proxy of community abundance, index-bleed in datasets being analyzed by presence-absence metrics is a problematic scenario. To identify and combat index-bleed, we created a non-biological synthetic mock community (SynMock) of ITS-like sequences that behave like real ITS sequences during the HTAS workflow. Because the SynMock sequences are not known to occur in nature, they can be effectively used to measure index-bleed in a sequencing run. A similar approach was recently described for 16S amplicons using synthesized oligonucleotides (Kim et al. 2017). We propose that HTAS studies of fungal ITS communities should employ SynMock or a similar non-biological mock community as a technical control. Additional controls such as a biological mock community of mixed fruiting bodies, spores, hyphae, etc. of taxa of interest are also useful if the experiment is designed to identify the prevalence of particular taxa.

The bioinformatics pipeline presented here, AMPtk, was developed to specifically address the quality issues that we have identified by using spike-in mock communities and to provide the scientific community with a necessary tool to study fungal community diversity. AMPtk is a flexible solution that can be used to study other regions used in HTAS, such as mitochondrial cytochrome oxidase 1 (mtCO1) of insects and the large subunit (LSU) of the rRNA array. The goal of AMPtk is to reduce data processing to a few simple steps and to improve the output of HTAS studies. Due to the inherent properties of HTAS and the ITS molecular barcode, we take the position that studies of this nature should be used as a preliminary survey of which taxa present in an ecosystem and that inferring relative abundance from read numbers should be avoided. To understand relative abundance of particular taxa in a community, additional independent assays such as taxa specific qPCR or digital PCR are warranted.

## Acknowledgements

We sincerely thank Rita Rentmeester for assisting with the growth of some the cultures used to create the biological mock community. Funding was provided by the US Forest Service, Northern Research Station.

## Author Contributions

All authors (JMP, MAJ, MTB, DLL) conceived and designed the experiments. MAJ and MTB conducted laboratory experiments. JMP analyzed sequence data and wrote AMPtk. JMP wrote the paper with input from all authors.

## Data availability

Raw sequencing reads and data processing scripts are available at the Open Science Framework at <https://osf.io/4xd9r/>. Sequencing data will be deposited in NCBI SRA prior to publication.

## Competing financial interests

The authors declare no competing financial interests.

## References

- Abarenkov K, Henrik Nilsson R, Larsson K-H, Alexander IJ, Eberhardt U, Erland S, Høiland K, Kjølner R, Larsson E, Pennanen T, Sen R, Taylor AFS, Tedersoo L, Ursing BM, Vrålstad T, Liimatainen K, Peintner U, and Kõljalg U. 2010. The UNITE database for molecular identification of fungi--recent updates and future perspectives. *The New phytologist* 186:281-285. [papers2://publication/doi/10.1111/j.1469-8137.2009.03160.x](https://doi.org/10.1111/j.1469-8137.2009.03160.x)
- Aird D, Ross MG, Chen W-S, Danielsson M, Fennell T, Russ C, Jaffe DB, Nusbaum C, and Gnirke A. 2011. Analyzing and minimizing PCR amplification bias in Illumina sequencing libraries. *Genome Biology* 12:R18. [papers2://publication/doi/10.1186/gb-2011-12-2-r18](https://doi.org/10.1186/gb-2011-12-2-r18)
- Amend AS, Seifert KA, and Bruns TD. 2010. Quantifying microbial communities with 454 pyrosequencing: does read abundance count? *Molecular Ecology* 19:5555-5565. [papers2://publication/doi/10.1111/j.1365-294X.2010.04898.x](https://doi.org/10.1111/j.1365-294X.2010.04898.x)
- Callahan BJ, McMurdie PJ, Rosen MJ, Han AW, Johnson AJA, and Holmes SP. 2016. DADA2: High-resolution sample inference from Illumina amplicon data. *Nature Methods*.
- Caporaso JG, Kuczynski J, Stombaugh J, Bittinger K, Bushman FD, Costello EK, Fierer N, Peña AG, Goodrich JK, Gordon JI, Huttley GA, Kelley ST, Knights D, Koenig JE, Ley RE, Lozupone CA, McDonald D, Muegge BD, Pirrung M, Reeder J, Sevinsky JR, Turnbaugh PJ, Walters WA, Widmann J, Yatsunenkov T, Zaneveld J, and Knight R. 2010. QIIME allows analysis of high-throughput community sequencing data. *Nature Methods* 7:335-336. [papers2://publication/doi/10.1038/nmeth.f.303](https://doi.org/10.1038/nmeth.f.303)
- Carlsen T, Aas AB, Lindner D, Vrålstad T, Schumacher T, and Kausrud H. 2012. Don't make a mista(g)ke: is tag switching an overlooked source of error in amplicon pyrosequencing



- studies? *Fungal Ecology* 5:747-749.  
papers2://publication/doi/10.1016/j.funeco.2012.06.003
- Cock PJA, Antao T, Chang JT, Chapman BA, Cox CJ, Dalke A, Friedberg I, Hamelryck T, Kauff F, Wilczynski B, and de Hoon MJL. 2009. Biopython: freely available Python tools for computational molecular biology and bioinformatics. *Bioinformatics (Oxford, England)* 25:1422-1423. papers2://publication/doi/10.1093/bioinformatics/btp163
- De Filippis F, Laiola M, Blaiotta G, and Ercolini D. 2017. Different amplicon targets for sequencing-based studies of fungal diversity. *Applied and Environmental Microbiology*. papers2://publication/doi/10.1128/AEM.00905-17
- Degnan PH, and Ochman H. 2012. Illumina-based analysis of microbial community diversity. *The ISME journal* 6:183-194.
- Edgar R. 2016. SINTAX: a simple non-Bayesian taxonomy classifier for 16S and ITS sequences. *bioRxiv*:074161.
- Edgar RC. 2010. Search and clustering orders of magnitude faster than BLAST. *Bioinformatics* 26:2460-2461. 10.1093/bioinformatics/btq461
- Edgar RC. 2013. UPARSE: highly accurate OTU sequences from microbial amplicon reads. *Nature Methods* 10:996-998. 10.1038/nmeth.2604
- Edgar RC, and Flyvbjerg H. 2015. Error filtering, pair assembly and error correction for next-generation sequencing reads. *Bioinformatics*. 10.1093/bioinformatics/btv401
- Ganley ARD, and Kobayashi T. 2007. Highly efficient concerted evolution in the ribosomal DNA repeats: total rDNA repeat variation revealed by whole-genome shotgun sequence data. *Genome Research* 17:184-191. papers2://publication/doi/10.1101/gr.5457707
- Gardes M, and Bruns T. 1993. ITS primers with enhanced specificity for basidiomycetes - application to the identification of mycorrhizae and rusts. *Molecular Ecology* 2:113-118.
- Hunter JD. 2007. Matplotlib: A 2D Graphics Environment. *Computing in Science & Engineering* 9:90-95. papers2://publication/doi/10.1109/MCSE.2007.55
- Ihrmark K, Bödeker IT, Cruz-Martinez K, Friberg H, Kubartova A, Schenck J, Strid Y, Stenlid J, Brandström-Durling M, and Clemmensen KE. 2012. New primers to amplify the fungal ITS2 region—evaluation by 454-sequencing of artificial and natural communities. *FEMS Microbiology Ecology* 82:666-677.
- James TY, Marino JA, Perfecto I, and Vandermeer J. 2016. Identification of putative coffee rust mycoparasites via single-molecule DNA sequencing of infected pustules. *Applied and Environmental Microbiology* 82:631-639. papers2://publication/doi/10.1128/AEM.02639-15
- Jusino M, Banik M, Palmer J, Wray A, Xiao L, Pelton E, Barber J, Kawahara A, Gratton C, Peery M, and Lindner D. 2017. An improved method for utilizing high-throughput amplicon sequencing to determine the diets of insectivorous animals. *PeerJ Preprints* 5:e3184v3181. 10.7287/peerj.preprints.3184v1
- Kebschull JM, and Zador AM. 2015. Sources of PCR-induced distortions in high-throughput sequencing data sets. *Nucleic Acids Research* 43:e143. papers2://publication/doi/10.1093/nar/gkv717
- Kim D, Hofstaedter CE, Zhao C, Mattei L, Tanes C, Clarke E, Lauder A, Sherrill-Mix S, Chehoud C, Kelsen J, Conrad M, Collman RG, Baldassano R, Bushman FD, and Bittinger K. 2017. Optimizing methods and dodging pitfalls in microbiome research. *Microbiome* 5:52. papers2://publication/doi/10.1186/s40168-017-0267-5
- Kircher M, Heyn P, and Kelso J. 2011. Addressing challenges in the production and analysis of illumina sequencing data. *BMC Genomics* 12:382. papers2://publication/doi/10.1186/1471-2164-12-382
- Kircher M, Sawyer S, and Meyer M. 2012. Double indexing overcomes inaccuracies in multiplex sequencing on the Illumina platform. *Nucleic Acids Research* 40:e3. papers2://publication/doi/10.1093/nar/gkr771

- Lindner DL, and Banik MT. 2008. Molecular phylogeny of Laetiporus and other brown rot polypore genera in North America. *Mycologia* 100:417-430.  
papers2://publication/uuid/806C097A-EA90-4BEF-91CB-DFDBEB97E893
- Lindner DL, and Banik MT. 2011. Intragenomic variation in the ITS rDNA region obscures phylogenetic relationships and inflates estimates of operational taxonomic units in genus *Laetiporus*. *Mycologia* 103:731-740.
- McDonald D, Clemente JC, Kuczynski J, Rideout JR, Stombaugh J, Wendel D, Wilke A, Huse S, Hufnagle J, Meyer F, Knight R, and Caporaso JG. 2012. The Biological Observation Matrix (BIOM) format or: how I learned to stop worrying and love the ome-ome. *Gigascience* 1:7. papers2://publication/doi/10.1186/2047-217X-1-7
- McKinney W. Data structures for statistical computing in Python. Proceedings of the 9th Python in Science Conference. p 51-56.
- McMurdie PJ, and Holmes S. 2013. phyloseq: an R package for reproducible interactive analysis and graphics of microbiome census data. *PloS One* 8:e61217.  
papers2://publication/doi/10.1371/journal.pone.0061217
- McMurdie PJ, and Holmes S. 2014. Waste not, want not: why rarefying microbiome data is inadmissible. *PLoS Computational Biology* 10:e1003531.  
papers2://publication/doi/10.1371/journal.pcbi.1003531
- Morgan M, Anders S, Lawrence M, Aboyoun P, Pagès H, and Gentleman R. 2009. ShortRead: a bioconductor package for input, quality assessment and exploration of high-throughput sequence data. *Bioinformatics (Oxford, England)* 25:2607-2608.  
papers2://publication/doi/10.1093/bioinformatics/btp450
- Nguyen NH, Smith D, Peay K, and Kennedy P. 2015. Parsing ecological signal from noise in next generation amplicon sequencing. *The New phytologist* 205:1389-1393.  
papers2://publication/doi/10.1111/nph.12923
- Nguyen NH, Song Z, Bates ST, Branco S, and Tedersoo L. 2016. FUNGuild: An open annotation tool for parsing fungal community datasets by ecological guild - ScienceDirect. *Fungal Ecology*. papers2://publication/uuid/B7232D5D-10C3-4635-881E-E2B7AFF3DEF8
- Oliver AK, Brown SP, Callahan MA, and Jumpponen A. 2015. Polymerase matters: non-proofreading enzymes inflate fungal community richness estimates by up to 15 %. *Fungal Ecology*. papers2://publication/uuid/964E8450-1CD3-45C0-B4E0-D035F1A5FAF2
- Philippe E, Franck L, and Jan P. 2015. Accurate multiplexing and filtering for high-throughput amplicon-sequencing. *Nucleic Acids Research*:gkv107.
- Pinto AJ, and Raskin L. 2012. PCR biases distort bacterial and archaeal community structure in pyrosequencing datasets. *PloS One* 7:e43093.  
papers2://publication/doi/10.1371/journal.pone.0043093
- Polz MF, and Cavanaugh CM. 1998. Bias in template-to-product ratios in multitemplate PCR. *Applied and Environmental Microbiology* 64:3724-3730.  
papers2://publication/uuid/506BCE6F-BFA9-4F40-A562-E7384DE21453
- Quast C, Pruesse E, Yilmaz P, Gerken J, Schweer T, Yarza P, Peplies J, and Glockner FO. 2013. The SILVA ribosomal RNA gene database project: improved data processing and web-based tools. *Nucleic Acids Research* 41:D590-596.  
papers2://publication/doi/10.1093/nar/gks1219
- Rognes T, Flouri T, Nichols B, Quince C, and Mahé F. 2016. VSEARCH: a versatile open source tool for metagenomics. *PeerJ* 4:e2584.
- Roper M, Ellison C, Taylor JW, and Glass NL. 2011. Nuclear and genome dynamics in multinucleate ascomycete fungi. *Current Biology* 21:R786-793.  
papers2://publication/doi/10.1016/j.cub.2011.06.042

- Schloss PD, Westcott SL, Ryabin T, Hall JR, Hartmann M, Hollister EB, Lesniewski RA, Oakley BB, Parks DH, Robinson CJ, Sahl JW, Stres B, Thallinger GG, Van Horn DJ, and Weber CF. 2009. Introducing mothur: open-source, platform-independent, community-supported software for describing and comparing microbial communities. *Applied and Environmental Microbiology* 75:7537-7541. 10.1128/AEM.01541-09
- Schnell IB, Bohmann K, and Gilbert MTP. 2015. Tag jumps illuminated—reducing sequence-to-sample misidentifications in metabarcoding studies. *Molecular Ecology Resources* 15:1289-1303.
- Schoch CL, Seifert KA, Huhndorf S, Robert V, Spouge JL, Levesque CA, Chen W, Bolchacova E, Voigt K, and Crous PW. 2012. Nuclear ribosomal internal transcribed spacer (ITS) region as a universal DNA barcode marker for Fungi. *Proceedings of the National Academy of Sciences* 109:6241-6246.
- Simon UK, and Weiss M. 2008. Intragenomic variation of fungal ribosomal genes is higher than previously thought. *Molecular Biology and Evolution* 25:2251-2254.  
papers2://publication/doi/10.1093/molbev/msn188
- Smith DP, and Peay KG. 2014. Sequence depth, not PCR replication, improves ecological inference from next generation DNA sequencing. *PloS One* 9:e90234.  
papers2://publication/doi/10.1371/journal.pone.0090234
- Šošić M, and Šikić M. 2017. Edlib: a C/C++ library for fast, exact sequence alignment using edit distance. *Bioinformatics (Oxford, England)* 33:1394-1395.  
papers2://publication/doi/10.1093/bioinformatics/btw753
- Taylor DL, Walters WA, Lennon NJ, Bochicchio J, Krohn A, Caporaso JG, and Pennanen T. 2016. Accurate estimation of fungal diversity and abundance through improved lineage-specific primers optimized for Illumina amplicon sequencing. *Applied and Environmental Microbiology* 82:7217-7226. papers2://publication/doi/10.1128/AEM.02576-16
- Tedersoo L, Tooming-Klunderud A, and Anslan S. 2018. PacBio metabarcoding of Fungi and other eukaryotes: errors, biases and perspectives. *New Phytologist* 217:1370-1385.  
papers2://publication/doi/10.1111/nph.14776
- Tonge DP, Pashley CH, and Gant TW. 2014. Amplicon-based metagenomic analysis of mixed fungal samples using proton release amplicon sequencing. *PloS One* 9:e93849.  
papers2://publication/doi/10.1371/journal.pone.0093849
- Tourlousse DM, Yoshiike S, Ohashi A, Matsukura S, Noda N, and Sekiguchi Y. 2017. Synthetic spike-in standards for high-throughput 16S rRNA gene amplicon sequencing. *Nucleic Acids Research* 45:e23. papers2://publication/doi/10.1093/nar/gkw984
- van der Walt S, Colbert SC, and Varoquaux G. 2011. The NumPy Array: A Structure for Efficient Numerical Computation. *Computing in Science & Engineering* 13:22-30.  
papers2://publication/doi/10.1109/MCSE.2011.37
- Vesty A, Biswas K, Taylor MW, Gear K, and Douglas RG. 2017. Evaluating the impact of DNA extraction method on the representation of human oral bacterial and fungal communities. *PloS One* 12:e0169877. papers2://publication/doi/10.1371/journal.pone.0169877
- Wang Q, Garrity GM, Tiedje JM, and Cole JR. 2007. Naive Bayesian classifier for rapid assignment of rRNA sequences into the new bacterial taxonomy. *Applied and Environmental Microbiology* 73:5261-5267.  
papers2://publication/doi/10.1128/AEM.00062-07
- White T, Bruns TD, Lee S, and Taylor J. 1990. Amplification and direct sequencing of fungal ribosomal RNA genes for phylogenetics. *PCR protocols: a guide to methods and applications*:315 - 322.
- Wright ES, and Vetsigian KH. 2016. Quality filtering of Illumina index reads mitigates sample cross-talk. *BMC Genomics* 17:876. papers2://publication/doi/10.1186/s12864-016-3217-x

Wu J-Y, Jiang X-T, Jiang Y-X, Lu S-Y, Zou F, and Zhou H-W. 2010. Effects of polymerase, template dilution and cycle number on PCR based 16 S rRNA diversity analysis using the deep sequencing method. *BMC Microbiology* 10:255.  
papers2://publication/doi/10.1186/1471-2180-10-255
